# Supplementary material
Source: PubMed Central journal article supplement (PMC3085400)
Supplement: NIHMS282479-supplement-supplement.pdf [file NIHMS282479-supplement-supplement.pdf]

## VISCOSITY AND INTERFACIAL PROPERTIES IN A MUSSEL-INSPIRED ADHESIVE COACERVATE

Dong Soo Hwang<sup>a,†</sup>, Hongbo Zeng<sup>b,d,†</sup>, Aasheesh Srivastava<sup>a</sup>, Daniel V. Krogstad<sup>a</sup>, Matthew Tirrell<sup>a,b,e</sup>, Jacob N. Israelachvili<sup>a,b</sup> and J. Herbert Waite<sup>c</sup>

<sup>a</sup>Materials Research Laboratory, <sup>b</sup>Department of Chemical Engineering, <sup>c</sup>Department of Molecular, Cell, and Developmental Biology, University of California, Santa Barbara, California 93106, USA

<sup>d</sup>Department of Chemical and Materials Engineering, University of Alberta, Edmonton, Alberta, T6G 2V4, Canada

<sup>e</sup>Departments of Bioengineering, Chemical Engineering and Materials Science & Engineering, Materials Science Division, Lawrence Berkeley Laboratory, University of California, Berkeley, CA 94720-1762, USA

<sup>†</sup>D.S. Hwang and H. Zeng contributed equally to this work

### **Polycation:** rec mussel adhesive protein (MW 23 kDa; pI 10)

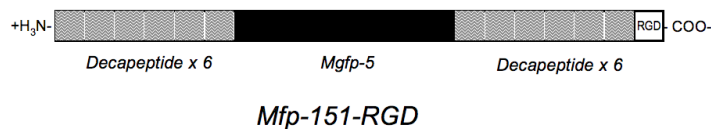

### **Polyanion:** hyaluronic acid (MW 35,000; pI 2.5)

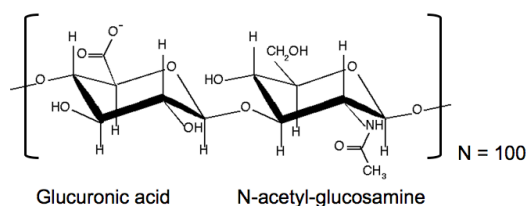

**Figure S1.** Polycationic and polyanionic macromolecules used for complex coacervation. The polycation (*above*) is a fusion protein consisting of two domains taken from mussel adhesive proteins in which the tandemly repeated decapeptide sequence AKPSYPPTYK (from mfp-1) is at the ends, whereas the Lys, Tyr, Gly-rich sequence of mfp-5 is in the core; the polyanion is hyaluronic acid (*below*).

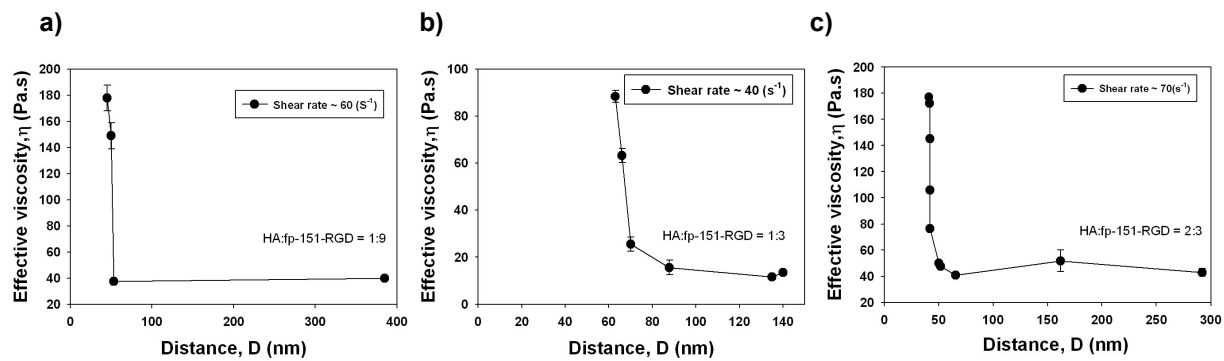

**Figure S2.** Viscosities of complex coacervate depending gap distance between two mica sheets, HA :fp-151-RGD ratio of (a) 1:9, (b) 1:3, (c) 2:3 (w/w)).

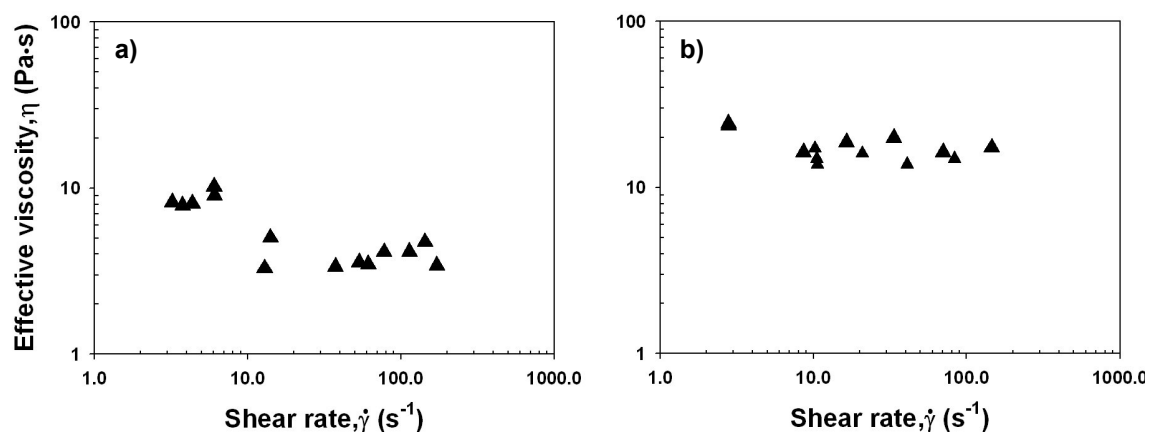

**Figure S3.** Viscosities of (a) HA and (b) fp-151-RGD depending on shear rate. Polyelectrolyte concentrations are both 100 mg/mL.
